# Supplementary material for: The effect of land cover on the foraging behavior and pollen in the honey of the giant bee Apis dorsata in Sumatra
Source: Frontiers journal article supplement (doi:10.3389/frbee.2024.1366287), 2024-04-05
Supplement: Table_2.docx [file Table_2.docx]

Table S2. Importance Value Index (IVI) of several vegetation stages of (a) Trees, (b) Poles, (c) Saplings, and (d) Seedlings in the Kampar region. RD: Relative Density, RF: Relative Frequency, and RDo: Relative Dominance. The datasets can be found in an online repository, DOI: https://zenodo.org/doi/10.5281/zenodo.10454308.

1. **Trees**

| **No** | **Scientific Name** | **Family** | **RD (%)** | **RF (%)** | **RDo (%)** | **IVI (%)** |
| --- | --- | --- | --- | --- | --- | --- |
| 1 | *Artocarpus maingayi* | Moraceae | 9,09 | 9,62 | 32,17 | 50,87 |
| 2 | *Alseodaphne sp.* | Lauraceae | 13,64 | 13,46 | 7,76 | 34,86 |
| 3 | *Polyalthia glauca* | Annonaceae | 16,67 | 7,69 | 8,62 | 32,98 |
| 4 | *Luvunga sp.* | Rutaceae | 7,58 | 9,62 | 2,11 | 19,31 |
| 5 | *Hopea sp.* | Dipterocarpaceae | 6,06 | 5,77 | 7,42 | 19,25 |
| 6 | *Diospyros sp.* | Ebenaceae | 3,03 | 1,92 | 13,06 | 18,01 |
| 7 | *Dillenia sp.* | Dilleniaceae | 4,55 | 3,85 | 3,92 | 12,31 |
| 8 | *Dacryodes sp.* | Burseraceae | 4,55 | 5,77 | 1,33 | 11,65 |
| 9 | *Koompassia malaccensis* | Fabaceae | 3,03 | 3,85 | 3,04 | 9,91 |
| 10 | Sp. 1 | - | 3,03 | 3,85 | 2,06 | 8,94 |
| 11 | *Ficus sp.* | Moraceae | 1,52 | 1,92 | 5,38 | 8,82 |
| 12 | *Irvingia malayana* | Dipterocarpaceae | 1,52 | 1,92 | 4,29 | 7,73 |
| 13 | *Ficus sp.* | Moraceae | 3,03 | 3,85 | 0,76 | 7,64 |
| 14 | *Vatica stapfiana* | Dipterocarpaceae | 3,03 | 3,85 | 0,71 | 7,58 |
| 15 | *Palaquium sp.* | Sapotaceae | 3,03 | 3,85 | 0,66 | 7,53 |
| 16 | *Myristica iners* | Myristicaceae | 3,03 | 1,92 | 2,53 | 7,49 |
| 17 | *Polyalthia lateriflora* | Annonaceae | 1,52 | 1,92 | 0,88 | 4,31 |
| 18 | *Polyalthia hypoleuca* | Annonaceae | 1,52 | 1,92 | 0,7 | 4,14 |
| 19 | *Dillenia excelsa* | Dilleniaceae | 1,52 | 1,92 | 0,59 | 4,03 |
| 20 | Artocarpus sp. | Moraceae | 1,52 | 1,92 | 0,45 | 3,89 |
| 21 | *Cratoxylum formosum* | Hypericaceae | 1,52 | 1,92 | 0,41 | 3,85 |
| 22 | *Glochodium rubrum* | Phyllanthaceae | 1,52 | 1,92 | 0,33 | 3,77 |
| 23 | Sp. 2 | - | 1,52 | 1,92 | 0,28 | 3,72 |
| 24 | *Sauropus androgynus* | Euphorbiaceae | 1,52 | 1,92 | 0,27 | 3,71 |
| 25 | Sp. 3 | - | 1,52 | 1,92 | 0,27 | 3,71 |
| **Total** | | | **100,00** | **100,00** | **100,00** | **300,00** |

1. **Poles**

| **No** | **Scientific Name** | **Family** | **RD (%)** | **RF (%)** | **RDo (%)** | **IVI (%)** |
| --- | --- | --- | --- | --- | --- | --- |
| 1 | *Alseodaphne sp.* | Lauraceae | 3,45 | 34,38 | 4,13 | 41,95 |
| 2 | *Dillenia sp.* | Dilleniaceae | 13,79 | 9,38 | 12,46 | 35,63 |
| 3 | *Vatica stapfiana* | Dipterocarpaceae | 13,79 | 6,25 | 11,33 | 31,38 |
| 4 | Sp. 3 | - | 10,34 | 6,25 | 10,1 | 26,69 |
| 5 | *Luvunga sp.* | Rutaceae | 10,34 | 6,25 | 8,73 | 25,32 |
| 6 | *Quercus sp.* | Fagaceae | 10,34 | 3,13 | 10,79 | 24,26 |
| 7 | *Quercus sp.* | Fagaceae | 6,9 | 6,25 | 7,85 | 21 |
| 8 | *Polyalthia lateriflora* | Annonaceae | 6,9 | 6,25 | 7,16 | 20,31 |
| 9 | *Garcinia parvifolia* | Clusiaceae | 3,45 | 3,13 | 4,92 | 11,49 |
| 10 | *Polyalthia hypoleuca* | Annonaceae | 3,45 | 3,13 | 4,59 | 11,17 |
| 11 | *Polyalthia glauca* | Annonaceae | 3,45 | 3,13 | 4,59 | 11,17 |
| 12 | *Palaquium sp.* | Sapotaceae | 3,45 | 3,13 | 4,28 | 10,86 |
| 13 | Sp. 6 | - | 3,45 | 3,13 | 4,13 | 10,7 |
| 14 | *Calophyllum spp.* | Clusiaceae | 3,45 | 3,13 | 3,15 | 9,72 |
| 15 | *Artocarpus maingayi* | Moraceae | 3,45 | 3,13 | 1,77 | 8,34 |
| **Total** | | | **100,00** | **100,00** | **100,00** | **300,00** |

1. **Sapling**

| **No** | **Scientific Name** | **Family** | **RD (%)** | **RF (%)** | **IVI (%)** |
| --- | --- | --- | --- | --- | --- |
| 1 | Sp. 4 | Fabaceae | 79,17 | 35 | 114,17 |
| 2 | *Dillenia sp.* | Dilleniaceae | 4,17 | 15 | 19,167 |
| 3 | *Dacryodes sp.* | Burseraceae | 5,56 | 10 | 15,556 |
| 4 | *Durio carinatus* | Bombacaceae | 1,39 | 5 | 6,389 |
| 5 | *Diallium platichepalum* | Fabaceae | 1,39 | 5 | 6,389 |
| 6 | *Quercus sp.* | Fagaceae | 1,39 | 5 | 6,389 |
| 7 | *Polyalthia hypoleuca* | Annonaceae | 1,39 | 5 | 6,389 |
| 8 | *Gluta renghas* | Anacardiaceae | 1,39 | 5 | 6,389 |
| 9 | Sp. 5 | - | 1,39 | 5 | 6,389 |
| 10 | *Anisophyllea disticha* | Anisophylleaceae | 1,39 | 5 | 6,389 |
| 11 | *Drypetes neglecta* | Putranjivaceae | 1,39 | 5 | 6,389 |
| **Total** | | | **100,00** | **100,00** | **200,00** |

1. **Seedling**

| **No** | **Scientific Name** | **Family** | **RD (%)** | **RF (%)** | **IVI (%)** |
| --- | --- | --- | --- | --- | --- |
| 1 | Sp. 4 | Fabaceae | 70,67 | 36,36 | 107,03 |
| 2 | *Kailarsenia tentaculata* | Rubiaceae | 12 | 27,27 | 39,27 |
| 3 | *Gordonia excelsa* | Theaceae | 17,33 | 36,36 | 53,7 |
| **Total** | | | **100,00** | **100,00** | **200,00** |
